# 1 An all-solid-state heterojunction oxide transistor for the rapid detection of 2 biomolecules and SARS-CoV-2 spike S1 protein

3 Yen-Hung Lin<sup>1,2,\*†</sup>, Yang Han<sup>3,4,†</sup>, Abhinav Sharma<sup>5</sup>, Wejdan S. AlGhamdi<sup>5</sup>, Chien-Hao  
4 Liu<sup>6</sup>, Tzu-Hsuan Chang<sup>7</sup>, Xi-Wen Xiao<sup>6</sup>, Akmaral Seitkhan<sup>5</sup>, Alexander D. Mottram<sup>8</sup>,  
5 Pichaya Pattanasattayavong<sup>8</sup>, Hendrik Faber<sup>5</sup>, Martin Heeney<sup>3,\*</sup>, Thomas D. Anthopoulos<sup>1,5,\*</sup>

6 <sup>1</sup>Department of Physics, Imperial College London, London SW7 2AZ, U.K.

7 <sup>2</sup>Clarendon Laboratory, Department of Physics, University of Oxford, Oxford OX1 3PU, U.K.

8 <sup>3</sup>Department of Chemistry, Imperial College London, London SW7 2AZ, U.K.

9 <sup>4</sup>School of Materials Science and Engineering, Tianjin University, Tianjin 300072, P.R. China.

10 <sup>5</sup>King Abdullah University of Science and Technology (KAUST), KAUST Solar Centre, Thuwal  
11 23955-6900, Saudi Arabia.

12 <sup>6</sup>Department of Mechanical Engineering, National Taiwan University, Taipei 10617, Taiwan

13 <sup>7</sup>Department of Electrical Engineering, National Taiwan University, Taipei 10617, Taiwan

14 <sup>8</sup>Department of Materials Science and Engineering, School of Molecular Science and Engineering,  
15 Vidyasirimedhi Institute of Science and Technology (VISTEC), Rayong 21210, Thailand.

16 †These authors contributed equally to this work.

17 Correspondence (\*):

18 [thomas.anthopoulos@kaust.edu.sa](mailto:thomas.anthopoulos@kaust.edu.sa);

19 [m.heeney@imperial.ac.uk](mailto:m.heeney@imperial.ac.uk);

20 [yen-hung.lin@physics.ox.ac.uk](mailto:yen-hung.lin@physics.ox.ac.uk)  
21

## 22 Abstract

23 Solid-state transistor sensors that can detect biomolecules in real time are highly attractive for  
24 emerging bioanalytical applications. However, combining cost-effective manufacturing with  
25 high sensitivity, specificity and fast sensing response, remains challenging. Here we develop  
26 low-temperature solution-processed In<sub>2</sub>O<sub>3</sub>/ZnO heterojunction transistors featuring a  
27 geometrically engineered tri-channel architecture for rapid real-time detection of different  
28 biomolecules. The sensor combines a high electron mobility channel, attributed to the quasi-  
29 two-dimensional electron gas (q2DEG) at the buried In<sub>2</sub>O<sub>3</sub>/ZnO heterointerface, in close  
30 proximity to a sensing surface featuring tethered analyte receptors. The unusual tri-channel  
31 design enables strong coupling between the buried q2DEG and the minute electronic  
32 perturbations occurring during receptor-analyte interactions allowing for robust, real-time  
33 detection of biomolecules down to attomolar (aM) concentrations. By functionalizing the tri-  
34 channel surface with SARS-CoV-2 (Severe Acute Respiratory Syndrome Coronavirus 2)  
35 antibody receptors, we demonstrate real-time detection of the SARS-CoV-2 spike S1 protein  
36 down to attomolar concentrations in under two minutes.  
37

## 1 **Main text**

2 Miniaturised biochemical sensors fabricated via high-throughput manufacturing methods  
3 promise cost-effective, large-volume production for use in various technology sectors<sup>1</sup>. The  
4 present needs for biochemical detection are diverse and include environmental monitoring<sup>2</sup>,  
5 security systems<sup>3</sup>, and preventative medical care<sup>4</sup>. An ideal biochemical sensing platform  
6 should be able to accommodate a wide range of applications in biological and chemical  
7 detections with high-sensitivity<sup>5</sup> and selectivity<sup>6</sup>. Among the various types of sensing platforms,  
8 a solid-state transistor sensor is a highly-anticipated tool that could address these requirements  
9 as it provides the functionality of a transducer for converting a biochemical interaction into an  
10 amplified electrical signal<sup>7</sup>. This characteristic enables direct readout without the need of bulky  
11 peripheral driving (opto)electronics, such as amplifiers, excitation light sources and photo-  
12 detectors<sup>8</sup>.

13 For the successful use of solid-state transistors as biosensors, the channel should exhibit  
14 a large surface area<sup>9</sup> and tuneable surface chemistry<sup>10</sup>. The former allows tethering of a  
15 sufficient quantity of molecular receptors whilst the latter helps to preserve charge transport in  
16 the channel without unintentionally reacting with the environment. One widely reported  
17 biosensor technology platform is based on silicon-nanowire (Si-NW) transistors, but their  
18 manufacturing remains technologically demanding<sup>11,12,13</sup>. Alternative technologies such as  
19 solid-state thin-film transistors (TFT) made of metal oxide semiconductors offer scalable  
20 manufacturing and intriguing physical properties<sup>14-17</sup>. However, due to parasitic gating effects  
21 and associated performance deterioration<sup>18-21</sup>, the use of metal oxide transistors as biosensors  
22 has remained limited with most effort dedicated on liquid-gated transistors (LGTs)<sup>6,22-24</sup>. In  
23 spite of being one of the most studied device, LGT biosensors face the detrimental Debye  
24 screening effect<sup>6,25,26</sup> – a direct result of the operating principles that rely on electrochemical  
25 reactions<sup>27</sup>, or on the movement of analytes<sup>28</sup>, upon liquid-gating. Thus managing or  
26 overcoming the Debye screening effect is critical for developing ultra-sensitive transistor-  
27 based sensor technologies for emerging applications<sup>29</sup>.

28 Here, we introduce a nanometres-thin In<sub>2</sub>O<sub>3</sub>/ZnO heterojunction channel and combine  
29 it with a geometrically engineered tri-channel architecture several millimetres in size as a  
30 universal platform for rapid, selective and ultra-sensitive biosensing. The all-solid-state device  
31 features a central sensing channel and two side channels featuring a quasi-two-dimensional  
32 electron gas (q2DEG) formed at the buried heterointerface a few nanometres below the  
33 channel's surface. The flexible surface chemistry of metal oxides, on the other hand, allows  
34 direct functionalisation of different receptors. The unusual channel architecture offers ultrahigh

1 surface-area-to-volume ratio ( $10^6 \text{ cm}^2 \text{ cm}^{-3}$ ) and facilitates nm-proximity between the  
2 electrostatic perturbations occurring during surface-tethered receptor and analyte interaction,  
3 with the buried q2DEG channel. These unique features enable simultaneous signal transduction  
4 and amplification in an all-solid-state TFT platform enabling real-time detection of specific  
5 biomolecules down to attomolar (aM) concentrations under physiological relevant conditions.  
6 As a proof-of-concept we demonstrate selective sensing of the SARS-CoV-2 (Severe Acute  
7 Respiratory Syndrome Coronavirus 2) spike S1 protein in real-time with a limit of detection  
8 (LoD) of 865 aM.

9

### 10 **Quasi-two-dimensional oxide heterojunction channel**

11 We hypothesised that our recently developed solution-processed, high electron mobility  
12  $\text{In}_2\text{O}_3/\text{ZnO}$  heterojunction (HJ) transistors<sup>30</sup> offers unique features that could prove attractive  
13 for biosensing. Firstly, the buried electron channel located at the oxide HJ is physically  
14 separated from the receptor units tethered on its surface a few nm above<sup>31,32</sup>. This feature is  
15 expected to prevent degradation of electron transport upon sensing (due to Coulomb scattering)  
16 and preserve the transistor's performance. This is not the case for most biosensor transistors  
17 reported to date where the channel interacts directly with the receptor units and hence the  
18 analyte. To overcome this, liquid gating has been exploited for analyte detection in the liquid  
19 phase<sup>6,22,33</sup>. Secondly, the high electron mobility of the HJ TFTs offers the possibility for large  
20 electrical signals that are easy to detect and amplify even in large-size devices<sup>31</sup>.

21 We fabricated metal oxide HJ transistors using the staggered bottom-gate, top-contact  
22 (BG-TC) architecture shown in **Fig. 1a**. High-resolution transmission electron microscopy  
23 (HRTEM) analysis (**Fig. 1b**) of the channel reveals the formation of a well-defined HJ channel  
24 with thickness in the range of 8-10 nm. Atomic force microscopy (AFM) measurements show  
25 the existence of smooth layers as being deposited sequentially (**Fig. 1c-d**).  $\text{In}_2\text{O}_3$  exhibits the  
26 lowest peak-to-peak height ( $\Delta Z$ ) of 1.87 nm with a root-mean-square roughness ( $\sigma_{\text{RMS}}$ ) value  
27 of 0.20 nm, which are comparable to that of  $\text{SiO}_2$  ( $\Delta Z = 1.91 \text{ nm}$ ,  $\sigma_{\text{RMS}} = 0.21 \text{ nm}$ ). Subsequent  
28 deposition of ZnO atop  $\text{In}_2\text{O}_3$  leads to a slightly rougher topography ( $\Delta Z = 4.00 \text{ nm}$ ,  $\sigma_{\text{RMS}} =$   
29  $0.58 \text{ nm}$ ) indicative of a more textured surface<sup>31,34</sup>.

30 The  $\text{In}_2\text{O}_3/\text{ZnO}$  forms a type-II heterojunction where electrons migrate from the  
31 conduction band (CB) of ZnO to that of  $\text{In}_2\text{O}_3$ , leading to the formation of a q2DEG (**Fig. 1e**)<sup>32</sup>.  
32 The latter resembles 2DEG systems found in high electron mobility transistors (HEMTs) based  
33 on epitaxial inorganic heterointerfaces<sup>35</sup>. Although uncommon, the existence of q2DEG in

1 disordered/non-epitaxial heterointerfaces has been predicted, further corroborating our  
 2 findings and conclusions<sup>36</sup>. **Fig. 1f** and **1g** show representative sets of transfer and output  
 3 current-voltage (I-V) characteristics for a In<sub>2</sub>O<sub>3</sub>/ZnO HJ transistor with electron mobility and  
 4 current on-off ratio of >22 cm<sup>2</sup> V<sup>-1</sup> s<sup>-1</sup> and >10<sup>8</sup>, respectively. The presence of the q2DEG  
 5 system at the In<sub>2</sub>O<sub>3</sub>/ZnO interface is responsible for the electron current across the channel and  
 6 the high electron mobility measured<sup>32</sup>.

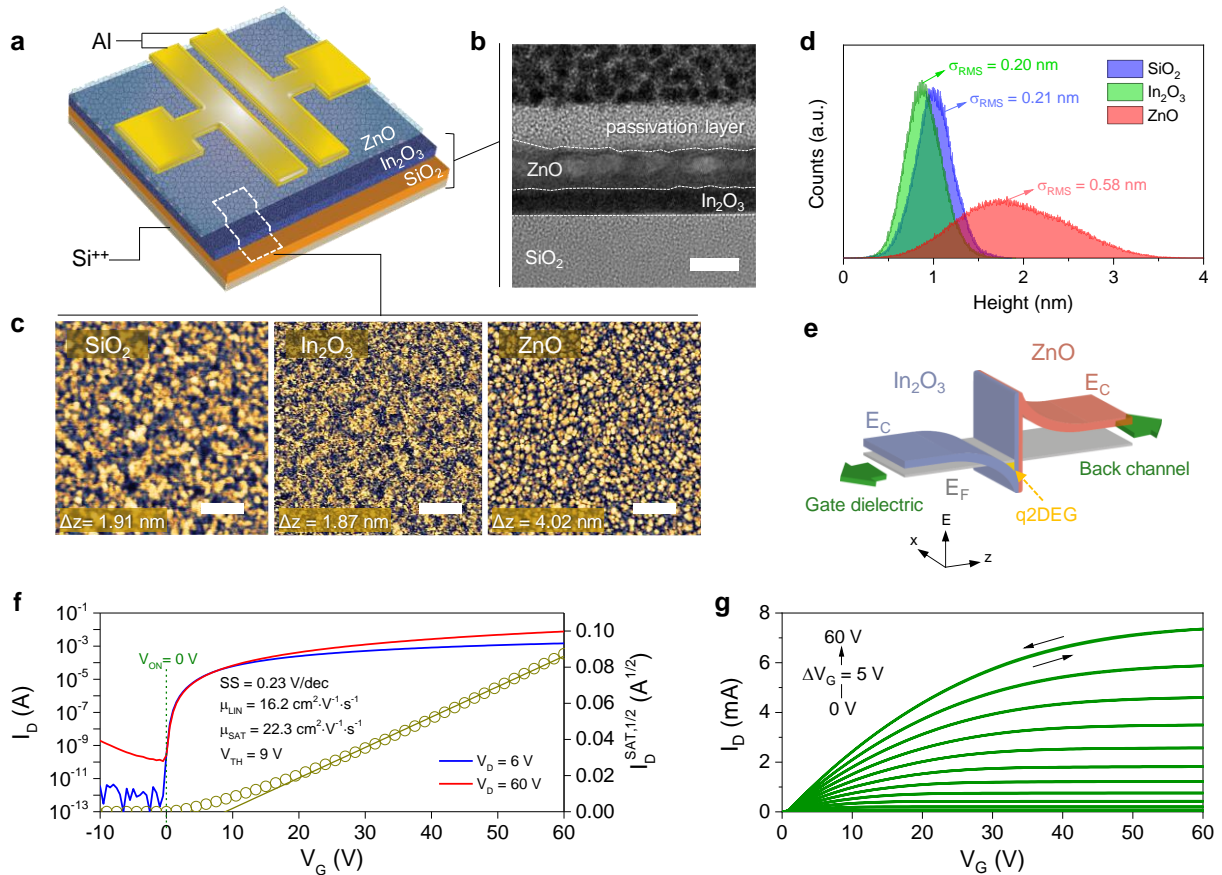

7  
8

9 **Figure 1 | Fabrication and testing of metal oxide heterojunction transistors.** **a**, Schematic  
 10 of an In<sub>2</sub>O<sub>3</sub>/ZnO heterojunction transistor. **b**, HRTEM cross-sectional image of the channel  
 11 region (scale bar = 5 nm). **c**, Intermittent AFM topography images of SiO<sub>2</sub>, In<sub>2</sub>O<sub>3</sub> and ZnO  
 12 surfaces (scale bar = 200 nm). **(d)** Height histogram extracted from the AFM data for each  
 13 sequentially deposited layer. Corresponding peak-to-peak height difference ( $\Delta Z$ ) and root  
 14 mean square surface roughness ( $\sigma_{RMS}$ ) were derived from AFM image analysis. **e**, Schematic  
 15 of energetic diagram for the In<sub>2</sub>O<sub>3</sub>/ZnO heterointerface. The discontinuity in the conduction  
 16 band between ZnO and In<sub>2</sub>O<sub>3</sub> results to the electron migration from ZnO to In<sub>2</sub>O<sub>3</sub>, resulting in  
 17 the formation of a q2DEG. **f,g**, Representative current-voltage (I-V) characteristics for a  
 18 In<sub>2</sub>O<sub>3</sub>/ZnO transistor: **(f)** transfer and **(g)** output characteristics. Important device parameters  
 19 are shown in **(f)**. These include turn on voltage ( $V_{ON}$ ), threshold voltage ( $V_{TH}$ ), subthreshold  
 20 swing (SS), linear mobility ( $\mu_{LIN}$ ), and saturation mobility ( $\mu_{SAT}$ ).

21  
22

## 1 All solid-state tri-channel transistor sensor

2 To investigate the suitability of the  $\text{In}_2\text{O}_3/\text{ZnO}$  transistors for biosensing, we fabricated devices  
 3 based on a tri-channel configuration on 4-inch Si wafers (**Fig. 2a**). The source-drain (S-D)  
 4 electrodes are deposited atop the  $\text{In}_2\text{O}_3/\text{ZnO}$  channel followed by the deposition of another  
 5 ultrathin (2-4 nm) protective ZnO layer. Next the known deoxyribonucleic acid (DNA)  
 6 intercalator<sup>37,38</sup> 1-pyrenebutyric acid (PBA) was functionalised directly to  $\text{ZnO}$ <sup>39</sup> acting as the  
 7 DNA receptor. A second functionalisation step using butyric acid (BA) was also applied to  
 8 ensure complete passivation of the ZnO surface (see **Supplementary Note 1** and  
 9 **Supplementary Figure 1**). The presence of the PBA molecules was verified using ultraviolet–  
 10 visible (UV-Vis) absorption measurements before and after functionalisation as evidenced by  
 11 the appearance of distinct absorption peaks associated with the pyrene unit (**Supplementary**  
 12 **Figure 2**). The completed device consists of two identical ‘conventional’ channels (hereafter  
 13 termed CC) 100  $\mu\text{m}$  in length (L), formed on the sides, and a third long (L = 2000  $\mu\text{m}$ ) ‘sensing’  
 14 channel (hereafter termed SC) formed in the central region of the device between the S-D  
 15 electrodes (see **Supplementary Figure 3**). This unique channel layout offers a large sensing  
 16 area channel where the analyte-containing solution can be easily applied while avoiding direct  
 17 contact with the S-D electrodes (**Fig. 2b-c**) which is known to induce parasitic gating effects<sup>40</sup>.  
 18

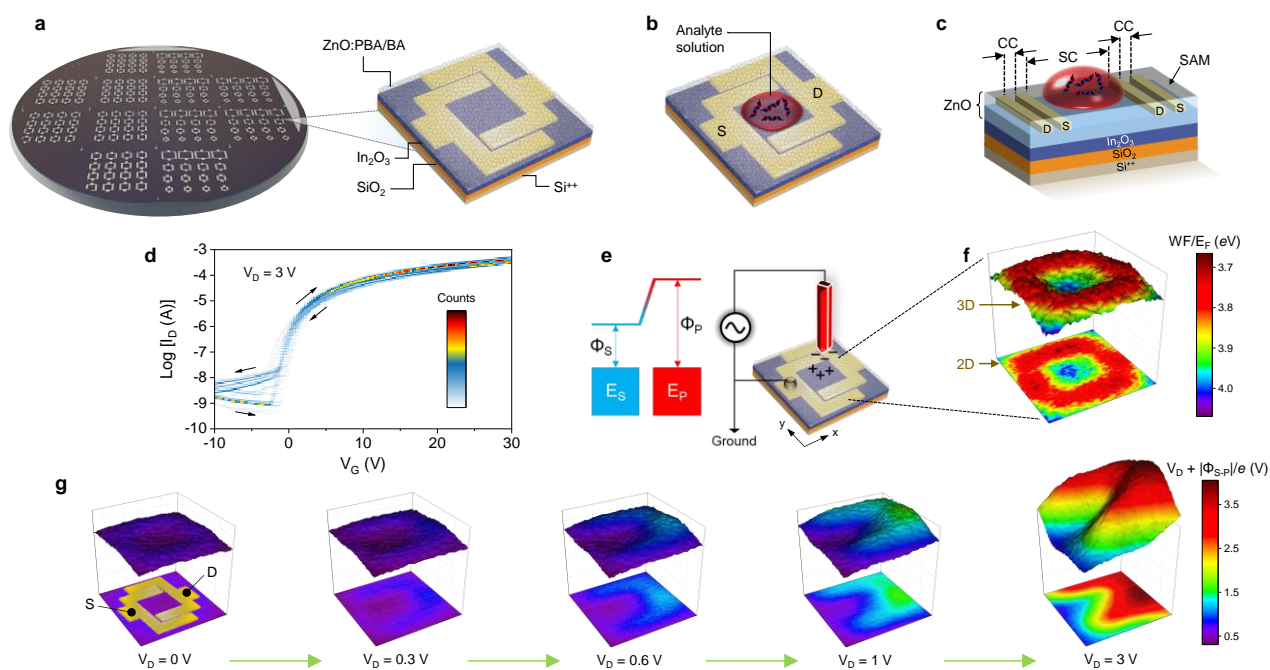

19

20 **Figure 2 | Design and structures of tri-channel transistor sensors.** **a**, Tri-channel  $\text{In}_2\text{O}_3/\text{ZnO}$   
 21 heterojunction transistors fabricated on a 4-inch  $\text{Si}^{++}/\text{SiO}_2$  wafer and schematic of the channel  
 22 architecture. The source-drain (S-D) electrodes are covered by the top ZnO layer. The receptor  
 23 molecule pyrenebutyric acid (PBA) and passivation molecule butyric acid (BA) are chemically

1 tethered onto the ZnO surface. **b**, Illustration of the direct application of analyte solution on  
2 the millimetre-scale sensing channel (SC) area of the sensor. **c**, Schematic of the tri-channel  
3 transistor depicting the location of the analyte solution within the SC and two conventional  
4 channels (CCs) on the sides. **d**, Density plots of forward-backward dual sweeps of current-  
5 voltage characteristics measured from 30 individual tri-channel transistor sensors. **e**, Schematic  
6 of the scanning Kelvin probe (SKP) setup used. The SKP method relies on the application of a  
7 voltage to offset the surface potential between the sample ( $\Phi_S$ ) and the tip ( $\Phi_P$ ). The magnitude  
8 of this voltage is then used to calculate the energy difference between the sample ( $E_S$ ) and the  
9 tip ( $E_P$ ). **f**, 2D (top)/3D (bottom) maps of the electrostatic potential across a tri-channel  
10 transistor measured by SKP. The WF for the embedded Al-electrode areas is measured to be  $\approx$   
11 3.8 eV while the  $E_F$  for the SC is  $\approx$  4.0 eV. **g**, Electrostatic potential maps measured at different  
12 source-drain potentials:  $V_D = 0, 0.3, 0.6, 1, 3$  V. The relative positions of the S-D electrodes  
13 are shown in the 2D map for  $V_D = 0$  V.  
14  
15

16 In **Supplementary Figures 4** and **5**, we plot the transistor transfer and output  
17 characteristics, respectively, measured before and after PBA and BA functionalisation. Unlike  
18 conventional transistor biosensors<sup>22,41</sup>, our tri-channel device shows negligible changes in its  
19 operating characteristics after receptor functionalisation. The narrow parameter distribution is  
20 better illustrated in **Fig. 2d** which shows the density plots<sup>42</sup> of the dual-sweep transfer  
21 characteristics for 30 individual tri-channel transistors fabricated on a single wafer. Critically,  
22 the tri-channel transistors exhibit robust operation even when subjected to 90 repeated dual I-  
23 V sweeps with negligible leakage current ( $I_G$ ) which is critical for optimal device operation and  
24 signal amplification (**Supplementary Figure 6**)<sup>43</sup>. These data demonstrate the high operational  
25 stability and reproducibility of the proposed tri-channel HJ transistor architecture.

26 To better understand the electrostatic potential landscape across our unconventional tri-  
27 channel device, we performed scanning Kelvin probe (SKP) measurements (**Fig. 2e**). **Fig. 2f**  
28 shows the two-dimensional (2D, bottom) and three-dimensional (3D, top) work function (WF)  
29 or Fermi energy ( $E_F$ ) maps for a tri-channel device measured. The influence of the buried Al  
30 electrodes beneath the ZnO results in local WF changes (3.8-4 eV), with the higher potential  
31 observed in the middle of the SC region. SKP measurements were also performed while  
32 applying a drain bias ( $V_D$ ) in the range of 0-3 V (**Fig. 2g**; the respective location of the device  
33 illustrated for  $V_D = 0$  V image). The application of low voltages (e.g.  $V_D = 0.6-1$  V) causes a  
34 substantial change within the SC, while increasing the applied bias to 3 V affects the potential  
35 landscape across the entire SC region, suggesting strong coupling between the SC and the two  
36 side CCs. Thus, the tri-channel architecture appears to enable spatially decoupling of the signal  
37 transduction occurring within the SC region from the current-driving CCs.

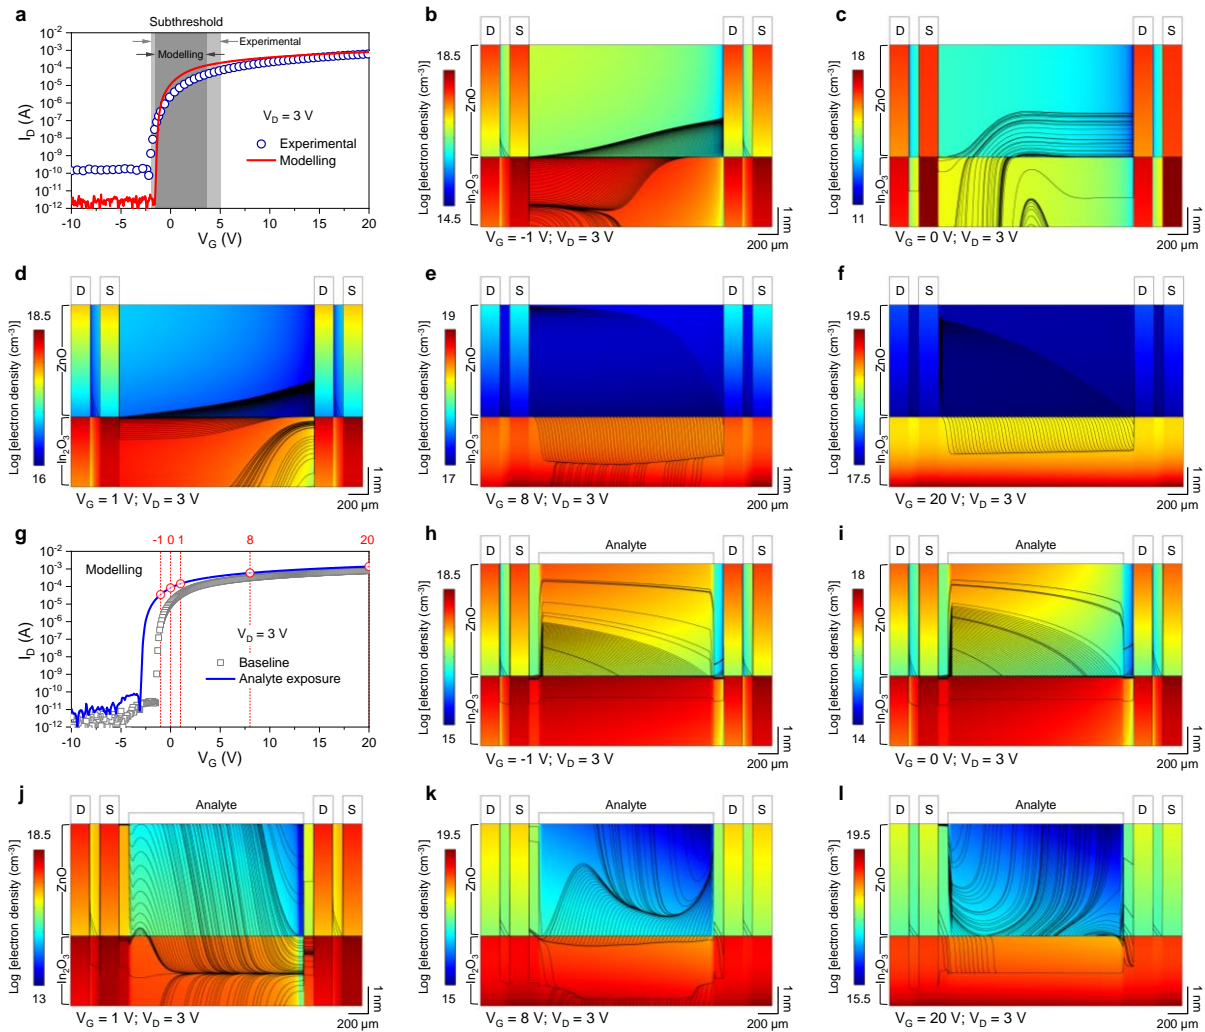

1

2 **Figure 3 | Physical principles of tri-channel transistor sensors.** a, Transfer current-voltage  
3 characteristics of tri-channel transistor sensors obtained from experiment and modelling using  
4 COMSOL Multiphysics®. The applied drain voltage ( $V_D$ ) was +3 V, and the subthreshold  
5 regions are indicated in grey. b,c,d,e,f, Corresponding COMSOL simulations showing the  
6 electron density distributions along the cross-section of the  $\text{In}_2\text{O}_3/\text{ZnO}$  heterostructure under  
7 the source (S) and drain (D) electrodes and the electron flow streamlines within the channel  
8 regions, with different gate voltages ( $V_G$ ) applied: (b) -1 V; (c) 0 V; (d) 1 V; (e) 8 V; (f) 20 V,  
9 and a constant  $V_D = 3$  V. g, Modelled transfer current-voltage characteristics ( $V_D = 3$  V)  
10 for baseline and under the exposure of simulated surface-charged analytes. h,i,j,k,l, Corresponding  
11 COMSOL electron density distributions under the influence of simulated analytes when  
12 applying  $V_D = 3$  V and  $V_G =$  (h) -1 V; (i) 0 V; (j) 1 V; (k) 8 V; (l) 20 V to the sensors. The  
13 electrodes and analytes are shown to indicate their positions with respect to the devices.

14

15 To understand how the tri-channel geometric impacts the electrical characteristics of  
16 the sensor, we modelled the device operation using the COMSOL Multiphysics® simulation  
17 software. **Fig. 3a** shows the simulated and measured transfer characteristics for a representative  
18 transistor. The various material and device parameters used in the modelling were adopted from

1 our previous studies on the same materials<sup>31,44,45</sup>. The small difference seen in the subthreshold  
2 region between the modelled and experimental data is attributed to the presence of trap states  
3 in the channel<sup>46,47</sup>, while the higher off current measured experimentally is due to the use of a  
4 common Si<sup>++</sup> gate substrate and the un-patterned layout of the In<sub>2</sub>O<sub>3</sub>/ZnO channel. Apart from  
5 these minor discrepancies, the model provides a good description of the tri-channel transistor  
6 operation and validates its applicability.

7 The main function of a transistor biosensor is to induce a perturbation in the channel  
8 current upon exposure to an external stimulus (analyte). To best illustrate this process in our  
9 sensor, we used the post-processing streamline tool for visualising the electron concentration  
10 and the streamlines of the channel current flow. **Fig. 3b-f** show the static distributions of the  
11 electron density and the streamlines of the current flow within the In<sub>2</sub>O<sub>3</sub>/ZnO heterostructure  
12 biased at V<sub>D</sub> = 3 V and V<sub>G</sub> = -1, 0, 1, 8 and 20 V. The results are in good agreement with our  
13 experimental observations and reveal the staggering enhancement in the current density within  
14 the In<sub>2</sub>O<sub>3</sub> of the heterointerface<sup>31,46</sup>. Next, we modelled the electrical characteristics of the  
15 device in the presence of an analyte. We hypothesize that the analyte species interacts with the  
16 surface-tethered receptor units and induce free charges at the surface of the SC region. To  
17 establish the sensing condition close to the limit of detection for our sensor, we assumed the  
18 number of additional charges induced by the analyte to be equivalent or lower than the number  
19 of mobile charges in the channel. Based on the literature<sup>48</sup> and our own measurements on  
20 similar metal oxide heterointerface channels<sup>31</sup>, device operation should remain largely  
21 unaltered when the additional electron concentration remains below 10<sup>17</sup> cm<sup>-3</sup>.<sup>34</sup> To ensure that  
22 this condition is satisfied, we used a more conservative estimation for the analyte-induced  
23 electron concentration of 10<sup>16</sup> cm<sup>-3</sup> and a channel thickness of 10 nm (**Fig. 1b**). The equivalent  
24 surface charge density due to analyte was then derived from the modelling yielding a value of  
25  $\approx 10^{10}$  cm<sup>-2</sup>, which will be considered for the different device operating scenarios next.

26 **Fig. 3g** shows the modelled transfer characteristics for a tri-channel (inset, **Fig. 3g**)  
27 In<sub>2</sub>O<sub>3</sub>/ZnO sensor while **Supplementary Figure 7** displays similar calculations for a single  
28 layer In<sub>2</sub>O<sub>3</sub> and a heterojunction In<sub>2</sub>O<sub>3</sub>/ZnO transistors based on the conventional channel  
29 geometry (insets in **Supplementary Figure 7a,c**) before (baseline) and after exposure to  
30 analyte (analyte exposure). The tri-channel In<sub>2</sub>O<sub>3</sub>/ZnO transistor shows a large response to the  
31 analyte (surface charge  $\approx 10^{10}$  cm<sup>-2</sup>) with the transfer curve shifted towards more negative V<sub>G</sub>  
32 bias. This is not the case for In<sub>2</sub>O<sub>3</sub> and In<sub>2</sub>O<sub>3</sub>/ZnO transistors with conventional channel  
33 geometry (**Supplementary Figure 7b,d**), where the analyte induces only a small perturbation  
34 in the current around the subthreshold region consistent with filling of sub-gap states<sup>49</sup>. The



1 modelled electron density and current flow for the tri-channel transistor biased at  $V_D = 3$  V and  
2  $V_G = -1, 0, 1, 8$  and 20 V, are presented in **Fig. 3h-l**, whilst the corresponding modelling results  
3 for the conventional channel  $\text{In}_2\text{O}_3$  (at  $V_D = 3$  V,  $V_G = 1$  V) and  $\text{In}_2\text{O}_3/\text{ZnO}$  (at  $V_D = 3$  V,  $V_G =$   
4  $-1$  and  $1$  V) transistors are shown in **Supplementary Figure 8a-b** and **8c-f**, respectively.  
5 Strikingly, we find that unlike the geometrically engineered heterojunction  $\text{In}_2\text{O}_3/\text{ZnO}$   
6 transistors (**Fig. 3h-l**), electron flow in the  $\text{In}_2\text{O}_3$  device is pinned at the interface with the gate  
7 dielectric while being fully decoupled from the surface/analyte (**Supplementary Figure 8b**).  
8 From these data we conclude that the tri-channel design is highly sensitive to the presence of  
9 surface charges as compared to conventional channel design, while single layer  $\text{In}_2\text{O}_3$  channel  
10 transistors are not ideal for all-solid-state biosensing applications.

11 Next, we considered the scenario where the heterojunction transistor is operated in  
12 depletion ( $V_G = -1$  V) and in the presence of analyte (i.e. additional  $\approx 10^{10}$   $\text{cm}^{-2}$  on the SC  
13 surface). Clear perturbations in the current flow are observed for both the tri-channel  
14  $\text{In}_2\text{O}_3/\text{ZnO}$  (**Fig. 3h-l**) and the conventional channel designs of  $\text{In}_2\text{O}_3/\text{ZnO}$  (**Supplementary**  
15 **Figures 8d** and **8f**) transistors. The broader distribution of streamlines seen in the tri-channel  
16 is consistent with the large negative shift in the turn-on voltage ( $V_{\text{ON}}$ ) of the device seen in **Fig.**  
17 **3g**. Regardless of the biasing scenarios (depletion or accumulation), the tri-channel architecture  
18 shows much stronger coupling to the analyte. Specifically, we find the electron flow  
19 streamlines to extend  $\approx 1$  nm beneath the SC surface (**Fig. 3h-l**) due to the asymmetric design  
20 of the source-drain electrodes<sup>50</sup>, which prevent the local electric field to fully pinch-off the  
21 channel for  $V_G$  between  $-1$  to  $1$  V. As the  $V_G$  increases ( $+20$  V), the benefits associated with  
22 the presence of a q2DEG in the  $\text{In}_2\text{O}_3/\text{ZnO}$  become even more apparent as the area beneath the  
23 sensing surface remains free from electrostatic screening induced by the gate (**Fig. 3l**).  
24 Nevertheless, it is known to be more advantageous for solid-state transistor sensors to be  
25 operated within the subthreshold region as it yields optimal sensitivity due to high signal gain<sup>51</sup>.

## 27 Receptor engineering for ultra-sensitive and real-time biosensing

28 To demonstrate that the working principle of our all-solid-state tri-channel transistor is  
29 fundamentally different from that of conventional liquid-gated sensors, we studied the ability  
30 of our transistors to detect different types of DNAs (analytes) dispersed in deionised (DI) water  
31 rather than in a high ionic strength solution. We note that the latter is essential for the function  
32 of liquid-gated transistor sensors in order to drive the analyte towards the semiconducting  
33 channel, which in turn modulates its transconductance via electrochemical processes<sup>6</sup>. To prove  
34 that our sensors do not rely on such processes, the DI-water based solutions containing double-

1 stranded DNA (dsDNA) and single-stranded DNA (ssDNA) of different sequences, were  
 2 applied directly onto the SC area while recording the device's response. **Fig. 4a** depicts the  
 3 envisioned interaction between dsDNA and PBA where the pyrene units on PBA intercalate  
 4 into the dsDNA<sup>52</sup>. **Fig. 4b-d** show the measured transfer characteristics ( $V_D = 3$  V) for different  
 5 concentrations of 20 base-pair segments of synthetic DNAs based on single-stranded adenine  
 6 (A) [abbreviated as A20], and thymine (T) [abbreviated as T20], as well as their  
 7 complementary dsDNA (AT)20. For (AT)20, a much larger change in the transistor's transfer  
 8 characteristics is observed with the lowest dsDNA concentrations studied down to 100 aM (**Fig.**  
 9 **4b**). The strong response is attributed exclusively to the intercalation of the pyrene units into  
 10 the minor grooves of the double-stranded (AT)20 since the presence of DI water has no  
 11 measurable effect (**Supplementary Figure 9**). The progressive shift of  $V_{ON}$  towards more  
 12 negative  $V_G$  seen in **Fig. 4b** is consistent with the modelling results of **Fig. 3g** where we  
 13 considered the presence of additional free charges on the surface of the SC. This observation  
 14 indicates that pyrene-NDA association generates free electrons that are eventually injected into  
 15 the channel. Further evidence supporting our hypothesis comes from sensing experiments  
 16 involving the single-stranded A20 (**Fig. 4c**) and T20 (**Fig. 4d**) where only minute changes are  
 17 observed in the transistors' characteristics due to the absence of pyrene-NDA intercalation.

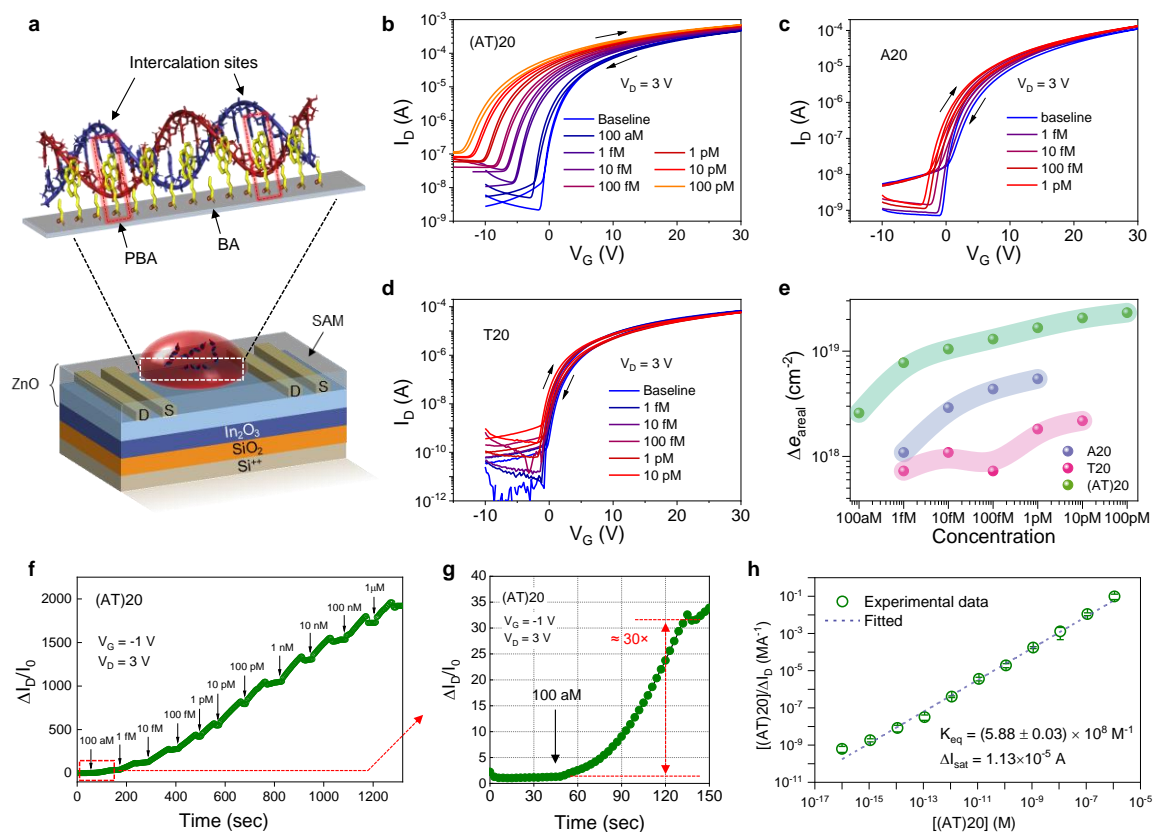

18

1 **Figure 4 | Tri-channel transistor sensor for synthetic DNA sensing.** **a**, Illustration of the  
2 envisioned intercalation between the pyrene units and dsDNA. **b,c,d**, Transfer I-V  
3 characteristics ( $V_D = 3$  V) measured from PBA/BA functionalised tri-channel transistor sensors  
4 with the presence of three different DNA analytes of **(b)** (AT)20; **(c)** A20; **(d)** T20 at different  
5 analyte concentrations. **e**, Plot of the increase in areal charge carriers  $\Delta e_{\text{areal}}$  that results from  
6 the sensing activity of the tri-channel transistor sensor to the analytes as a function of analyte  
7 concentration.  $\Delta e_{\text{areal}}$  is calculated from the shift in the turn-on voltage of the device upon the  
8 application of analyte solution. AT(20) shows the highest response due to its interaction via  
9 intercalation with pyrene units of the PBA-functionalised tri-channel transistor sensor. **f**, Real-  
10 time response signal measured from a PBA/BA functionalised solid-state tri-channel transistor  
11 sensor operated at  $V_G = -1$  V and  $V_D = 3$  V upon exposure to synthetic (AT)20 with  
12 concentrations from 100 aM to 1  $\mu$ M. **g**, recorded response to 100 aM showing  $\approx 30$  times  
13 enhancement in  $I_D$ . The arrows indicate the time when the different analyte concentrations were  
14 applied to the SC area of the tri-channel transistor. **h**, Fitting of experimental results of synthetic  
15 AT(20) sensing at different analyte concentrations according to the Langmuir adsorption  
16 isotherm. The error bars denote standard deviations from three real-time measurement sets.  
17

18 In an effort to quantify the sensor's response, we analysed the change in  $V_{\text{ON}}$  as a  
19 function of increasing analyte concentration. This shift reflects the increase in the electron  
20 concentration ( $\Delta e_{\text{areal}}$ ) within the channel and is given as<sup>53</sup>

$$21 \quad \Delta e_{\text{areal}} = \frac{C_{\text{areal}}[V_{\text{ON}}(\text{conc.}) - V_{\text{ON}}(\text{init.})]}{q} \quad (1)$$

22 Here,  $C_{\text{areal}}$  is the areal capacitance of the gate dielectric (34.4 nF  $\text{cm}^{-2}$ ),  $q$  is the elementary  
23 charge,  $V_{\text{ON}}(\text{init.})$  is the initial  $V_{\text{ON}}$  measured in the presence of blank solution (no analyte),  
24 and  $V_{\text{ON}}(\text{conc.})$  is the transistor's  $V_{\text{ON}}$  measured upon application of the analyte at each  
25 concentration. For simplicity, we assume all electrons are confined in a two-dimensional plane  
26 at the vicinity of the oxide HJ<sup>32</sup>. **Fig. 4e** shows the evolution of  $\Delta e_{\text{areal}}$  as a function of analyte  
27 concentration measured using a tri-channel sensor. (AT)20 induces the highest  $\Delta e_{\text{areal}}$ , a direct  
28 consequence of the large  $V_{\text{ON}}$  shift observed in **Fig. 4b**. These results demonstrate  
29 unambiguously that pyrene-(AT)20 intercalation produces signals several orders of magnitude  
30 larger than the non-intercalating ssDNAs A20 and T20 and showcase the ability of the tri-  
31 channel sensor to differentiate between double and single stranded DNAs without the need for  
32 complex fluorescence labelling<sup>54</sup>. To this end, the DNA conformation with respect to the  
33 substrate (i.e. lying-down or standing up), should not be critical as sensing relies exclusively  
34 on the charge transfer upon pyrene-DNA association. This hypothesis is corroborated by the  
35 sensor's ability to selectively detect different analytes, such as avidin and SARS-CoV-2 spike  
36 S1 protein, which will be discussed latter. The ability of our sensor to facilitate such a strong

1 coupling between the minute receptor-analyte interactions and charge transport, without  
2 compromising the channel transconductance ( $g_m$ ) (**Supplementary Note 2** and  
3 **Supplementary Figure 10**), is attributed to three unique device attributes:

- 4 (i) The geometrical engineered tri-channel design that enables strong coupling  
5 between current transport and receptor-analyte interactions within the sensing area  
6 of the channel.
- 7 (ii) The use of a high electron mobility  $\text{In}_2\text{O}_3/\text{ZnO}$  channel featuring a spatially-  
8 separated (buried) q2DEG system.
- 9 (iii) The versatile surface chemistry and the electronic properties of the metal oxide  
10 employed.

11 Due to the diverse range of biosensor transistor technologies<sup>5,6</sup> there is currently no  
12 clear consensus on the important figures of merit that can be used to define the performance of  
13 such devices. Here we attempt to draw an analogy from the field of phototransistors, since both  
14 types of sensors act as transducers with a highly  $V_G$ -dependent response and define two  
15 practical figures of merit namely the responsivity ( $R_{\text{analyte}}$ ) and sensitivity ( $S_{\text{analyte}}$ )  
16 (**Supplementary Note 3** and **Supplementary Figure 11**). We first investigated the suitability  
17 of our tri-channel biosensor TFTs for real-time sensing of (AT)20 at an extremely broad range  
18 of analyte concentrations ( $10^{-18}$  to  $10^{-6}$  M), while simultaneously assessing the sensors' ability  
19 to operate in aqueous conditions<sup>9,55</sup>. Specifically, we monitored the evolution of  $\Delta I_D$  at  $V_G = -$   
20 1 V and  $V_D = 3$  V, as a function of time for different (AT)20 concentrations. The biasing  
21 condition were chosen to maximise the sensor's response by operating it in the subthreshold  
22 region<sup>51</sup> (**Supplementary Figure 12**). **Fig. 4f** shows a representative real-time recording of  
23  $\Delta I_D/I_0$  (where  $I_0 = 3.16 \times 10^{-8}$  A) for analyte concentrations in the range  $10^{-18}$  to  $10^{-6}$  M, where  
24 a clear response across the entire range is observed. Even at 100 aM of (AT)20, the tri-channel  
25 TFT shows a significant increase in the  $\Delta I_D$  by  $\approx 30$  times (**Fig. 4g**) in under 2 min. This  
26 represents the highest response signal reported to date for biosensing transistors, including  
27 liquid-gated devices<sup>5,6,24</sup>. Importantly, the sensor's sensitivity can be tuned by the  $V_G$  as shown  
28 in **Supplementary Figure 13** where the  $S_{\text{analyte}}$  is plotted vs. (AT)20 concentration for different  
29  $V_G$  (-1, 0, +1 V). Even at sub-optimal biasing conditions (i.e.  $V_G = 1$  V), the measured  $I_D$  for  
30 100 aM (AT)20 increases to 4.2  $\mu\text{A}$  ( $\Delta I_D \approx 2.8$   $\mu\text{A}$ ) which is  $\approx 300\%$  higher than the baseline  
31 signal ( $I_0 \approx 1.4$   $\mu\text{A}$ ) (**Fig. 4b**). The large  $\Delta I_D$  indicates that the actual sensitivity of the tri-  
32 channel sensors is well below 100 aM. To this end, we note that in the literature the most  
33 frequently reported parameter is the LoD, which is determined by the minimum detectable  
34 signals that are often far from suitable for real-time monitoring<sup>5,6,41,56</sup>.

1 To further demonstrate the capabilities of our high  $S_{\text{analyte}}$  sensor, we analysed the  
2 sensing kinetics using the linear form of the Langmuir adsorption isotherm<sup>57,58</sup>.  
3 **Supplementary Figure 14a** displays a series of such measurements taken from **Fig. 4f** but  
4 replotted by setting the time (t) at which the different concentrations of analyte were applied,  
5 to 0 sec. **Supplementary Figure 14b** shows a representative trace for 1 pM of (AT)20 where  
6 three different sensing stages can be clearly distinguished:

- 7 (i) Concentration-limited diffusion stage where the receptor-analyte reaction rate  
8 is determined by the diffusive transport of the analyte on the sensor's surface as  
9 its concentration increases.
- 10 (ii) Association of analyte with the tethered receptor moieties i.e. 'primary' sensing  
11 process.
- 12 (iii) Dissociation of analyte-receptor complexes before reaching a thermodynamic  
13 equilibrium.

14 The rate of the 'primary' sensing process depicted in **Supplementary Figure 14b** is  
15 representative of a zero-order reaction and is independent of the analyte concentration or the  
16 method with which the analyte solution is being applied. For each concentration, a distinct peak  
17 between association and dissociation stages is observed and attributed to the immobilisation of  
18 analyte species by the tethered receptors<sup>59-61</sup>. Therefore, and regardless of the sensing method,  
19 the existence of two-phase kinetics relates solely to the association and dissociation stages.  
20 Using the high fidelity sensing data from **Supplementary Figure 14**, the equilibrium constant  
21 ( $K_{\text{eq}}$ ) was calculated yielding values of  $(5.88 \pm 0.03) \times 10^8 \text{ M}^{-1}$  (**Fig. 4h**).

22 In addition to short synthetic DNA, we have also tested natural dsDNA extracted from  
23 calf thymus tissue, which has much longer DNA sequences. **Fig. 5a-b**, respectively, show the  
24 transfer characteristics ( $V_{\text{D}} = 3 \text{ V}$ ) and real-time response recorded at fixed  $V_{\text{D}} = 3 \text{ V}$  and  $V_{\text{G}}$   
25  $= -1 \text{ V}$  (**Supplementary Figure 15**,  $I_0 = 2.63 \times 10^{-8} \text{ A}$ ). The response is similar to that recorded  
26 for (AT)20 indicating that the sensing mechanism remains identical for the natural dsDNA.  
27 Even when aM concentration of the dsDNA is applied, the recorded signal ( $\Delta I_{\text{D}}/I_0$ ) increases  
28 by more than 100× (inset of **Fig. 5b**), further corroborating the unprecedented sensitivity of  
29 the tri-channel sensor. When compared to (AT)20, the sensor exhibits stronger response to  
30 natural dsDNA with a higher binding constant  $K_{\text{eq}}$  of  $(8.71 \pm 0.01) \times 10^9 \text{ M}^{-1}$  (**Fig. 5c**). This  
31 difference is attributed to the stronger interaction between the longer sequence of calf thymus  
32 DNA and the surface-tethered pyrene receptor.

33

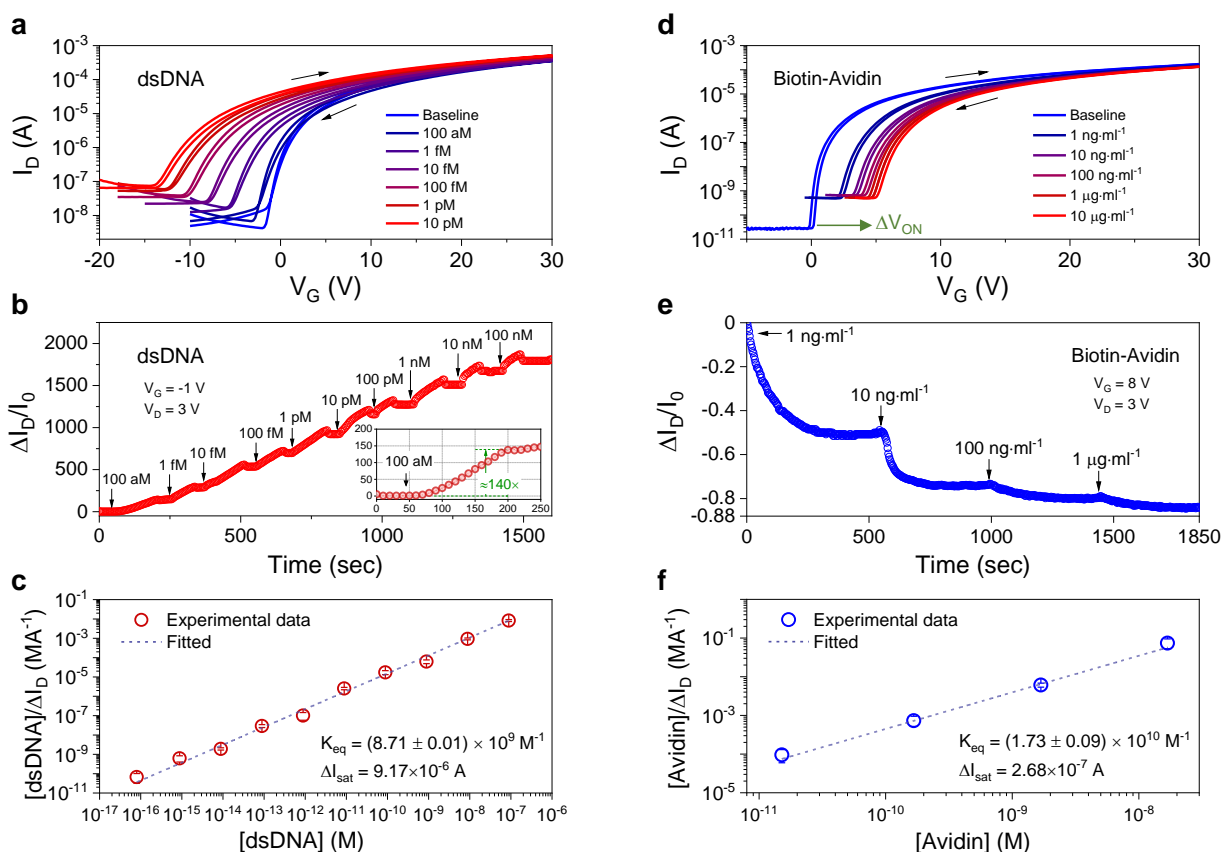

1  
2 **Figure 5 | Attomolar detection of natural biomolecules.** **a**, Transfer characteristics ( $V_D = 3$   
3 V) of a PBA/BA functionalised tri-channel transistor sensor measured in the presence of natural  
4 dsDNA extracted from calf thymus. **b**, Real-time response of the tri-channel transistor sensor  
5 to different concentrations (100 aM to 100 nM) of natural dsDNA. Inset: The sensor's response  
6 to a 100 aM of the analyte is  $\approx 140$  times higher than the baseline signal. For this experiment  
7 the device was operated at  $V_G = -1$  V and  $V_D = 3$  V. **c**, Fitting of the experimental results for  
8 natural dsDNA at different analyte concentrations according to the Langmuir adsorption  
9 isotherm. The error bars denote standard deviations from three real-time measurement sets. **d**,  
10 Transfer characteristics ( $V_D = 3$  V) measured from a biotin-functionalised tri-channel transistor  
11 sensor subject to different concentrations of avidin. **e**, Real-time response obtained from the  
12 biotin-based tri-channel transistor sensor biased at  $V_G = 8$  V and  $V_D = 3$  V. The avidin  
13 concentration was varied from  $10 \text{ ng ml}^{-1}$  to  $1 \text{ } \mu\text{g ml}^{-1}$ . The arrows indicate the time when the  
14 avidin was applied to the SC area of the sensor. **f**, Fitting of experimental results of avidin  
15 sensing at different analyte concentrations according to the Langmuir adsorption isotherm. The  
16 error bars denote standard deviations from three real-time measurement sets.

17

18

19 We also investigated the possibility of sensing the formation of the positively charged  
20 biotin-avidin pair – an important complex for biochemical analysis<sup>62</sup>. For this purpose, we first  
21 functionalised the ZnO surface with biotin, acting as the receptor, and then applied avidin (the  
22 analyte) dispersed in DI solution at different concentrations. **Fig. 5d** reveals a systematic shift  
23 in  $V_{ON}$  of the transistors towards more positive  $V_G$  with increasing avidin concentration. This  
24 indicates a continuously reducing electron concentration in the channel due to the positively

1 charged nature of avidin and its electron accepting character. **Fig. 5e** shows real-time sensing  
2 of different concentrations of avidin. Here a higher voltage bias of  $V_D = 3$  V,  $V_G = 8$  V  
3 (**Supplementary Figure 16**,  $I_0 = 1.89 \times 10^{-5}$  A) was used in order to compensate for the large  
4 positive shift in  $V_{ON}$  upon biotin-avidin association. Analysis of the binding constant between  
5 avidin and surface-immobilised biotin (**Fig. 5f**) yields a  $K_{eq}$  of  $1.73 (\pm 0.09) \times 10^{10} \text{ M}^{-1}$ . This  
6 value is lower than that reported for free avidin-biotin pairs ( $10^{13}$ – $10^{15} \text{ M}^{-1}$ )<sup>63,64</sup> – a result most  
7 likely attributed to the smaller number of tethered biotin receptors.

8 To summarize, the sensing mechanism in our all-solid-state tri-channel transistor  
9 sensors is starkly different to that of liquid-gated sensor platforms<sup>5,6,22-28</sup>. The sensing process  
10 is modelled by considering the generation of free charges on the SC's surface upon receptor-  
11 analyte association (**Fig. 3g-l**) and its strong coupling to the channel current. The higher  
12 gradients in the electron flow streamlines observed towards the HJ/analyte interface and the  
13 higher electron density highlight how excess charges are introduced and transported across the  
14 device upon receptor-analyte interaction. Importantly, the sensor can be easily repurposed via  
15 receptor engineering to detect both negatively (i.e. DNAs) as well as positively charged (i.e.  
16 biotin-avidin) analytes. In the case of biotin-avidin interaction the channel current was found  
17 to reduce due to the electron accepting nature of the formed complex. Another important  
18 feature of the tri-channel sensor is the large size SC and its ability to accommodate a high  
19 density of receptors which in turn enable dynamic sensing over an extraordinary wide range of  
20 analyte concentrations (**Supplementary Figure 14**).

21

## 22 **Detection of SARS-CoV-2 spike S1 protein**

23 To demonstrate the potential of the tri-channel transistors in a real-world sensing scenario, we  
24 engineered the surface of the SC by immobilizing SARS-CoV-2 antibody acceptors designed  
25 for specific binding to the SARS-CoV-2 spike S1 protein (**Fig. 6a**)<sup>56</sup>. The receptor-binding  
26 domain (RBD) of the spike protein is known to bind the human cell receptor angiotensin-  
27 converting enzyme 2 (ACE2), followed by subsequent viral entry. During binding the  
28 positively charged polybasic cleavage site on the spike protein binds strongly with the  
29 negatively charged human cell receptor ACE2<sup>65</sup>. We hypothesized that such interaction would  
30 induce electrostatic perturbations that are detectable by the tri-channel sensor. The sensing  
31 scheme is rather straightforward and could prove highly versatile for the detection of the new  
32 corona virus and other pathogens of interest.

1 To test our hypothesis, we first examined the ability of the sensor to operate under  
 2 physiological-relevant conditions. The antibody-tethered tri-channel sensor show negligible  
 3 response upon application of different concentrations of the high ionic strength phosphate  
 4 buffered saline (PBS) solution onto the SC (**Supplementary Figures 17 and 18**). Next, a series  
 5 of PBS solutions containing different concentrations of the SARS-CoV-2 spike S1 protein were  
 6 prepared and applied to the SC of the sensor while the transfer characteristics were recorded  
 7 for each analyte concentration (**Fig. 6b** and **Supplementary Figure 19a**). A clear and  
 8 systematic shift in  $V_{ON}$  towards more negative gate voltages with increasing analyte  
 9 concentration, is observed. Strikingly, even at 10 aM the sensor's response remains large and  
 10 clearly visible in the quasi-static transfer characteristics of **Fig. 6b** indicating a high sensitivity.

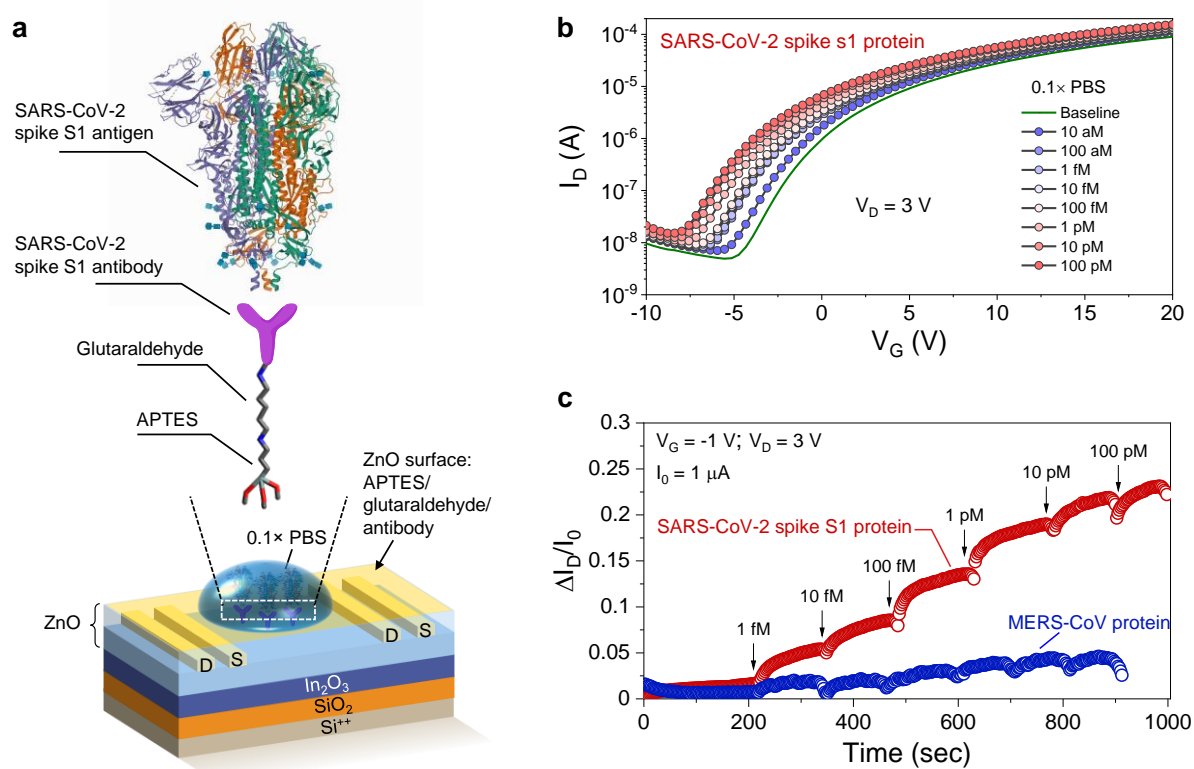

11  
 12 **Figure 6 | Detection of SARS-CoV-2 spike protein.** **a**, Schematic of the SARS-CoV-2 spike  
 13 S1 protein detection. The SARS-CoV-2 spike S1 antibody is anchored onto the sensor platform  
 14 after the sequential modification of oxide surface with 3-aminopropyltriethoxysilane (APTES)  
 15 and glutaraldehyde. **b**, Transfer characteristics ( $V_D = 3$  V) of a fully functionalised tri-channel  
 16 transistor sensor measured in the presence of the SARS-CoV-2 spike protein in 0.1× phosphate-  
 17 buffered saline (PBS, baseline). **c**, Real-time response of the tri-channel transistor sensors to  
 18 different concentrations (1 fM to 100 pM) of the SARS-CoV-2 spike protein and the MERS-  
 19 CoV protein in 0.1× PBS.

20

21 To further demonstrate the versatility of the tri-channel sensor, we performed real-time  
 22 sensing measurements of the SARS-CoV-2 spike S1 protein. Prior to this the sensor was biased  
 23 at  $V_G = -1$  V and  $V_D = 3$  V to acquire a stable baseline channel current of  $\approx 1$   $\mu$ A ( $\Delta I_D / I_0 = 0$ ).



1 Following, PBS solutions containing varying concentrations of the SARS-CoV-2 spike S1  
2 protein were applied sequentially to the SC while the sensor current being recorded in real-  
3 time (**Supplementary Figure 19b**). Evidently, the sensor can detect the analyte across an ultra-  
4 wide range of concentrations (aM to pM) demonstrating the tremendous potential of the  
5 technology. Similar to dsDNA real-time sensing data, the recorded signal ( $\Delta I_D/I_0$ ) for each  
6 concentration increases and reaches an equilibrium followed by a small dip due to the  
7 diffusion limited, association and dissociation stages discussed previously (**Supplementary**  
8 **Figure 14b**).

9 Lastly, we evaluated the specificity of our sensor towards the SARS-CoV-2 spike S1  
10 protein by comparing its real-time response against that of Middle East respiratory syndrome  
11 coronavirus (MERS-CoV) spike protein due to their genome similarities<sup>66</sup>. As can be seen in  
12 **Fig. 6c**, the tri-channel sensor can differentiate between the two proteins under physiological  
13 relevant conditions. For the MERS-CoV protein, the sensor shows no response with the signal  
14 remaining largely unaltered with increasing analyte concentration from 1 fM to 100 pM. On  
15 the contrary, exposure of the device to SARS CoV-2 spike S1 protein leads to a strong and  
16 systematic signal increase with increasing SARS-CoV-2 spike S1 protein concentration. The  
17 lowest concentration at which these differences are detectable can be deduced from **Fig. 6c**  
18 yielding a value of approximately 1 fM<sup>56</sup>. The LoD<sup>67</sup> was estimated by applying the  
19 International Union of Pure and Applied Chemistry (IUPAC) protocol<sup>68</sup> to the calibration plot  
20 for SARS-CoV-2 spike S1 protein in **Supplementary Figure 19c** yielding a value of 865 aM.

21

## 22 **Conclusions**

23 We have developed a simple-to-manufacture, millimetre-scale, all-solid-state metal oxide  
24 transistor sensor that can detect the presence of biomolecules down to attomolar concentrations  
25 in real time while being operated under physiologically relevant environments. The unique  
26 device architecture combines high sensitivity and a large dynamic range in an all-solid-state  
27 sensing platform capable for analyte sensing in the liquid-phase. The versatile surface  
28 chemistry of the metal oxides employed allows for the incorporation of different receptor units  
29 (e.g. antibodies, enzymatic recognition elements, aptamers), which is anticipated to enable the  
30 detection of a broader range of biomolecules with extraordinary sensitivity and specificity.  
31 Furthermore, the ability to distinguish between negatively and positively charged biomolecules  
32 as well as between the SARS-CoV-2 and MERS-CoV spike proteins, showcases the  
33 universality of the sensor platform, which could be exploited for addressing the most urgent  
34 sensing applications.

## 1 **METHOD**

2 **Preparation of metal-oxide precursors.** ZnO and In<sub>2</sub>O<sub>3</sub> precursor solutions were prepared by  
3 dissolving zinc oxide (99.99%; Sigma-Aldrich) in ammonium hydroxide (50% v/v; Alfa Aesar)  
4 at a concentration of 10 mg ml<sup>-1</sup> and anhydrous indium nitrate (99.99%; Indium Corporation)  
5 in 2-methoxyethanol (99.8%; Sigma-Aldrich) at a concentration of 20 mg ml<sup>-1</sup>, respectively.  
6 As-prepared solutions were then stirred rigorously at room temperature for 24 h before use.  
7 This process yielded clear transparent oxide precursor solutions.

8  
9 **Fabrication of low-dimensional oxide transistors.** Heavily doped silicon (Si<sup>++</sup>) wafers with  
10 a thermally grown SiO<sub>2</sub> top-layer (100 nm) were used as the common gate electrode and the  
11 gate dielectric, respectively. Prior to the semiconductor deposition, the substrates were  
12 sonicated in a solvent bath each lasting for ≈10 min in the following sequence: 1) deionised  
13 (DI) water with a Decon 90 detergent (5 vol%); 2) DI water; 3) acetone; 4) isopropanol. The  
14 solvent residue was dried with dry nitrogen over the substrate surface. As the last cleaning step,  
15 the substrates were exposed to ultraviolet (UV) ozone treatment for 10 min. The In<sub>2</sub>O<sub>3</sub> ultra-  
16 thin film was deposited by carrying out spin-casting of the as-prepared precursor solution onto  
17 the Si substrates at 6000 rpm for 30 s in ambient air, followed by a post-deposition thermal-  
18 annealing process for 60 min at 200 °C in ambient air. The top ZnO layer was deposited with  
19 the same procedure as that for the In<sub>2</sub>O<sub>3</sub> layer. Fabrication of the transistors (channel  
20 width/length = 1000/100 μm/μm) was completed with thermal evaporation of 40-nm thick Al  
21 top source and drain (S–D) electrodes through a shadow mask in high vacuum (≈10<sup>-6</sup> mbar).

22  
23 **Transistor characterisation.** Electrical characterisation of transistors was carried out using  
24 three micro-positioners (EB-700, EVERBEING), a homemade probe station and an Agilent  
25 B2902A source/measure unit in a nitrogen-filled glove box.

26  
27 **Self-assembled layer preparation and surface modification.** To prepare the modified device  
28 for DNA sensing, firstly 1-pyrenebutyric acid (PBA, 97%; Sigma-Aldrich) solution (1 mg ml<sup>-1</sup>  
29 <sup>1</sup> in anhydrous tetrahydrofuran (THF)) was applied on the surface of the transistor for 30 min  
30 and thoroughly rinsed with THF and dried under nitrogen atmosphere. Butyric acid (BA, ≥  
31 99%; Sigma-Aldrich) solution (1 mg ml<sup>-1</sup> in anhydrous THF) was then applied to the PBA  
32 modified surface for 30 min and thoroughly rinsed with THF and dried under nitrogen  
33 atmosphere. To prepare the modified device for avidin sensing, biotin (99%; Sigma-Aldrich)

1 solution ( $0.8 \text{ mg ml}^{-1}$  in anhydrous ethanol) was first applied on the surface of the transistor for  
2 30 min and thoroughly rinsed with ethanol and dried under nitrogen atmosphere. BA was then  
3 applied to fully passivate the uncovered surface following the same procedures above as for  
4 DNA sensor device.

5  
6 **Analyte preparation and sensing.** Deoxyribonucleic acid from calf thymus (Type XV,  
7 Activated, lyophilised powder), avidin (lyophilised powder,  $\geq 10$  units/mg protein), A20, T20,  
8 (AT)20, were purchased from Sigma and used as received. All analytes were well dissolved in  
9 MilliQ water ( $18.2 \text{ M}\Omega \cdot \text{cm}/25 \text{ }^\circ\text{C}$ ) to reach the desired concentration according to the solution  
10 preparation instruction provided by the supplier. For the sensing process, the analyte solution  
11 was constantly applied onto the sensing area, and the electrical properties of the sensor devices  
12 were then recorded. For the real time sensing, the channel current was monitored during the  
13 continuous and consecutive application of analyte solution of different concentrations onto the  
14 same sensor device.

15  
16 **Ultraviolet–visible spectroscopy measurements.** The ultraviolet–visible (UV-Vis)  
17 transmission measurements were performed using a Shimadzu UV-2600 UV–Vis  
18 spectrophotometer. The samples were prepared on quartz substrates using the same deposition  
19 parameters described in the Methods section for oxide thin-film deposition and self-assembled  
20 monolayer formation.

21  
22 **High-resolution transmission electron microscopy measurement.** The samples for high-  
23 resolution transmission electron microscopy (HRTEM) analysis were prepared using the  
24 focused ion beam processing technique. A gold-plated layer with thickness of 5 nm was coated  
25 on sample via sputtering before the sample preparation to make its surface more conductive.  
26 The HRTEM images were acquired at 300 kV by a FEI Titan G2 80–300 microscope equipped  
27 with a high-brightness Schottky-field emission electron source and a high-resolution Gatan  
28 imaging filter Tridiem energy-filter.

29  
30 **Atomic Force Microscopy measurement.** Atomic force microscopy study was carried out in  
31 tapping mode using an Agilent 5500 atomic force microscope in ambient atmosphere. The  
32 approximate resonance frequency of the cantilever was 280 kHz and force constant was  $\approx 60$   
33  $\text{N}\cdot\text{m}^{-1}$ .

1

2 **Scanning Kelvin probe measurement.** Scanning Kelvin probe investigations were carried out  
3 using a KP Technology system (model SKP5050/APS02) with a 1 mm tip. Scanning was  
4 achieved by taking an individual Kelvin probe (KP) measurement in one location and then  
5 moving the motorised stage to bring the sample in position for the next KP measurement. This  
6 was repeated until data was gathered in a grid pattern of 60×60 points, spanning an area of ca.  
7 4 mm × 4 mm. For each point location the tracking feature built into the software made sure to  
8 keep the average tip-to-sample-distance constant. Additional drain bias in the range of 0 to 3  
9 V was applied using a Keithley B2400 Source-Meter unit. The  $W_F$  and  $E_F$  values were  
10 calculated using Silver as the reference material. All measurements were carried out in ambient  
11 air at room temperature and relative humidity of ca. 25 %.

12

13 **Real-time sensing data analysis of (AT)20, natural dsDNA from calf thymus and avidin.**

14 The sensors' real-time recordings to synthetic dsDNA (AT)20 (**Fig. 4h**), natural dsDNA (**Fig.**  
15 **5c**) and avidin (**Fig. 5f**) at different analyte concentrations were fitted according to the linear  
16 Langmuir adsorption isotherm equation<sup>52</sup>:  $C_{\text{analyte}}/\Delta I_D = C_{\text{analyte}}/\Delta I_{\text{sat}} + 1/\Delta I_{\text{sat}}K_{\text{eq}}$ , where  $\Delta I_{\text{sat}}$  is  
17 the change of the saturated channel current upon increasing the concentration of analyte, and  
18  $K_{\text{eq}}$  is the binding constant of the analyte with its corresponding receptor.

19

20 **Solution preparation and device fabrication for spike S1 protein sensing experiments.** The

21 3-aminopropyltriethoxysilane (APTES) solution (99%), glutaraldehyde solution (70% in H<sub>2</sub>O),  
22 and phosphate buffered saline (PBS, pH 7.4, 10×) solution were purchased from Merck. SARS-  
23 CoV-2 spike S1 antibody (40150-R007), SARS-CoV-2 (2019-nCoV) Spike S1-His  
24 Recombinant Protein (40591-V08B1), MERS-CoV Spike/S1 Protein (S1 Subunit, aa 1-725,  
25 His Tag) (40069-V08H) were purchased from Sino Biological (China). All chemicals were  
26 used as received without further purification. Stock solutions of spike proteins were prepared  
27 using nuclease-free water and further diluted to different concentrations in 0.1× PBS where  
28 necessary. For the SARS-CoV-2 spike protein sensing, the tri-channel transistors were first  
29 treated with UV-irradiation for 10 min, APTES solution (2 wt%) in toluene was pipetted onto  
30 the oxide surface and left for 15 min, followed by rinsing with toluene and annealing at 120 °C  
31 for 1 h. A glutaraldehyde (GA) linker was added to the terminal amino (-NH<sub>2</sub>) groups of  
32 APTES using a solution of 0.8% GA in DI water for 10 min at room temperature, followed by  
33 rinsing with DI water and dried with a stream of N<sub>2</sub> gas. Next, a spike antibody solution (200

1  $\mu\text{g mL}^{-1}$ ) was applied onto the surface of the functionalised device and kept at room  
2 temperature for 5 h in order to immobilise the spike S1 antibodies via covalent bonding. To  
3 complete the immobilisation process, the devices were rinsed with  $0.1\times$  PBS to remove  
4 unbound antibodies. The presence of the antibodies on the surface of the sensing channel was  
5 verified via atomic force microscopy. The SARS-CoV-2 spike structure in **Fig. 6a** was adopted  
6 from the PDB ID: 6VYB<sup>69</sup>.

7  
8 **Device modelling and simulations.** The oxide transistor sensors were modelled and simulated  
9 using the semiconductor module in COMSOL Multiphysics. The cross-sectional model was  
10 constructed based on the actual device dimensions shown in **Supplementary Figure 3**. The  
11 oxide semiconductors were modelled based on material parameters taken from our previous  
12 reports<sup>31,32,70</sup>. The semiconducting  $\text{In}_2\text{O}_3/\text{ZnO}$  interface was modelled as a continuous quasi-  
13 Fermi-level heterojunction. The S-D electrodes were modelled as Ohmic contacts whilst the  
14 gate was modelled using the Thin Insulator Gate node, employing the same  $\text{SiO}_2$  dielectric  
15 condition as the actual device stack. The analyte was modelled as equivalent surface charges  
16 with a density of  $10^{10} \text{ cm}^{-2}$ . All the other boundaries were modelled as insulations, indicating  
17 no normal flux such as current and electric displacement fields. Due to the large aspect ratio of  
18 the ultrathin oxide structures, the mapped mesh was generated for the entire transistor channel  
19 area with fine rectangular meshes.

20  
21 **Data Availability:** The data that support the plots within this paper and other findings of this  
22 study are available from the corresponding authors upon reasonable request.

## 23 24 REFERENCES

- 25 1. Bhalla, N., Jolly, P., Formisano, N. & Estrela, P. Introduction to biosensors. *Essays*  
26 *Biochem.* **60**, 1-8 (2016).
- 27 2. Rodriguez-Mozaz, S., Lopez de Alda, M. J. & Barceló, D. Biosensors as useful tools for  
28 environmental analysis and monitoring. *Anal. Bioanal. Chem.* **386**, 1025-1041 (2006).
- 29 3. Engel, Y. *et al.* Supersensitive Detection of Explosives by Silicon Nanowire Arrays.  
30 *Angew. Chem. Int. Ed.* **49**, 6830-6835 (2010).
- 31 4. Hwang, B.-U. *et al.* Transparent Stretchable Self-Powered Patchable Sensor Platform with  
32 Ultrasensitive Recognition of Human Activities. *ACS Nano* **9**, 8801-8810 (2015).
- 33 5. Macchia, E. *et al.* Single-molecule detection with a millimetre-sized transistor. *Nat.*  
34 *Commun.* **9**, 3223 (2018).

- 1 6. Nakatsuka, N. *et al.* Aptamer-field-effect transistors overcome Debye length limitations  
2 for small-molecule sensing. *Science* **362**, 319-324 (2018).
- 3 7. Madou, M. J. & Morrison, S. R. *Chemical Sensing with Solid State Devices*. (Academic  
4 Press, 1989).
- 5 8. Pires, N., Dong, T., Hanke, U. & Hoivik, N. Recent Developments in Optical Detection  
6 Technologies in Lab-on-a-Chip Devices for Biosensing Applications. *Sensors* **14**, 15458  
7 (2014).
- 8 9. Stern, E. *et al.* Label-free immunodetection with CMOS-compatible semiconducting  
9 nanowires. *Nature* **445**, 519 (2007).
- 10 10. Park, I., Li, Z., Pisano, A. P. & Williams, R. S. Selective Surface Functionalization of  
11 Silicon Nanowires via Nanoscale Joule Heating. *Nano Lett.* **7**, 3106-3111 (2007).
- 12 11. Agarwal, A. *et al.* Silicon nanowire sensor array using top-down CMOS technology. *Sens.*  
13 *Actuat. A-Phys.* **145-146**, 207-213 (2008).
- 14 12. Huang, Y., Duan, X., Wei, Q. & Lieber, C. M. Directed Assembly of One-Dimensional  
15 Nanostructures into Functional Networks. *Science* **291**, 630-633 (2001).
- 16 13. Krivitsky, V., Zverzhinetsky, M. & Patolsky, F. Antigen-Dissociation from Antibody-  
17 Modified Nanotransistor Sensor Arrays as a Direct Biomarker Detection Method in  
18 Unprocessed Biosamples. *Nano Lett.* **16**, 6272-6281 (2016).
- 19 14. Yu, X., Marks, T. J. & Facchetti, A. Metal oxides for optoelectronic applications. *Nat.*  
20 *Mater.* **15**, 383 (2016).
- 21 15. Anthopoulos, T. D. Ultrathin channels make transistors go faster. *Nat. Mater.* **18**, 1033-  
22 1034 (2019).
- 23 16. Li, S. *et al.* Nanometre-thin indium tin oxide for advanced high-performance electronics.  
24 *Nat. Mater.* **18**, 1091-1097 (2019).
- 25 17. Fortunato, E., Barquinha, P. & Martins, R. Oxide Semiconductor Thin-Film Transistors:  
26 A Review of Recent Advances. *Adv. Mater.* **24**, 2945-2986 (2012).
- 27 18. Park, J. S., Jeong, J. K., Chung, H. J., Mo, Y. G. & Kim, H. D. Electronic transport  
28 properties of amorphous indium-gallium-zinc oxide semiconductor upon exposure to  
29 water. *Appl. Phys. Lett.* **92**, 072104 (2008).
- 30 19. Kim, S. J. *et al.* Low-cost label-free electrical detection of artificial DNA nanostructures  
31 using solution-processed oxide thin-film transistors. *ACS Appl. Mater. Interfaces* **5**,  
32 10715-10720 (2013).

- 1 20. Jung, J. *et al.* Electrical Responses of Artificial DNA Nanostructures on Solution-  
2 Processed In-Ga-Zn-O Thin-Film Transistors with Multistacked Active Layers. *ACS Appl.*  
3 *Mater. Interfaces* **5**, 98-102 (2013).
- 4 21. Jung, J. *et al.* Approaches to label-free flexible DNA biosensors using low-temperature  
5 solution-processed InZnO thin-film transistors. *Biosens. Bioelectron.* **55**, 99-105 (2014).
- 6 22. Chen, H. *et al.* Quasi-Two-Dimensional Metal Oxide Semiconductors Based  
7 Ultrasensitive Potentiometric Biosensors. *ACS Nano* **11**, 4710-4718 (2017).
- 8 23. Kim, J. *et al.* Fabrication of High-Performance Ultrathin In<sub>2</sub>O<sub>3</sub> Film Field-Effect  
9 Transistors and Biosensors Using Chemical Lift-Off Lithography. *ACS Nano* **9**, 4572-4582  
10 (2015).
- 11 24. Ohayon, D. *et al.* Biofuel powered glucose detection in bodily fluids with an n-type  
12 conjugated polymer. *Nat. Mater.* (2019).
- 13 25. Kulkarni, G. S. & Zhong, Z. Detection beyond the Debye Screening Length in a High-  
14 Frequency Nanoelectronic Biosensor. *Nano Lett.* **12**, 719-723 (2012).
- 15 26. Chu, C.-H. *et al.* Beyond the Debye length in high ionic strength solution: direct protein  
16 detection with field-effect transistors (FETs) in human serum. *Sci. Rep.* **7**, 5256 (2017).
- 17 27. Pan, L.-H. *et al.* An electrochemical biosensor to simultaneously detect VEGF and PSA  
18 for early prostate cancer diagnosis based on graphene oxide/ssDNA/PLLA nanoparticles.  
19 *Biosens. Bioelectron.* **89**, 598-605 (2017).
- 20 28. Elnathan, R. *et al.* Biorecognition Layer Engineering: Overcoming Screening Limitations  
21 of Nanowire-Based FET Devices. *Nano Lett.* **12**, 5245-5254 (2012).
- 22 29. Lubrano, C., Matrone, G. M., Iaconis, G. & Santoro, F. New Frontiers for Selective  
23 Biosensing with Biomembrane-Based Organic Transistors. *ACS Nano*, DOI:  
24 10.1021/acsnano.1020c07053 (2020).
- 25 30. Paterson, A. F. & Anthopoulos, T. D. Enabling thin-film transistor technologies and the  
26 device metrics that matter. *Nat. Commun.* **9**, 5264 (2018).
- 27 31. Faber, H. *et al.* Heterojunction oxide thin-film transistors with unprecedented electron  
28 mobility grown from solution. *Sci. Adv.* **3**, e1602640 (2017).
- 29 32. Lin, Y.-H. *et al.* High Electron Mobility Thin-Film Transistors Based on Solution-  
30 Processed Semiconducting Metal Oxide Heterojunctions and Quasi-Superlattices. *Adv. Sci.*  
31 **2**, 1500058 (2015).
- 32 33. Cheung, K. M. *et al.* Phenylalanine Monitoring via Aptamer-Field-Effect Transistor  
33 Sensors. *ACS Sens.* (2019).

- 1 34. Schießl, S. P. *et al.* Hybrid Modulation-Doping of Solution-Processed Ultrathin Layers of  
2 ZnO Using Molecular Dopants. *Adv. Mater.* **28**, 3952-3959 (2016).
- 3 35. Dingle, R., Störmer, H. L., Gossard, A. C. & Wiegmann, W. Electron mobilities in  
4 modulation-doped semiconductor heterojunction superlattices. *Appl. Phys. Lett.* **33**, 665-  
5 667 (1978).
- 6 36. Dominguezadame, F., Sanchez, A. & Diez, E. Quasi-Ballistic-Electron Transport in  
7 Random Superlattices. *Phys. Rev. B* **50**, 17736-17739 (1994).
- 8 37. Cho, N. & Asher, S. A. Uv Resonance Raman Studies of DNA Pyrene Interactions -  
9 Optical Decoupling Raman-Spectroscopy Selectively Examines External Site Bound  
10 Pyrene. *J. Am. Chem. Soc.* **115**, 6349-6356 (1993).
- 11 38. Laib, S., Krieg, A., Hafliger, P. & Agorastos, N. DNA-intercalation on pyrene modified  
12 surface coatings. *Chem. Commun.*, 5566-5568 (2005).
- 13 39. Tang, E., Cheng, G., Ma, X., Pang, X. & Zhao, Q. Surface modification of zinc oxide  
14 nanoparticle by PMAA and its dispersion in aqueous system. *Appl. Surf. Sci.* **252**, 5227-  
15 5232 (2006).
- 16 40. Heller, I. *et al.* Identifying the Mechanism of Biosensing with Carbon Nanotube  
17 Transistors. *Nano Lett.* **8**, 591-595 (2008).
- 18 41. Kim, J. *et al.* Fabrication of High-Performance Ultrathin In<sub>2</sub>O<sub>3</sub> Film Field-Effect  
19 Transistors and Biosensors Using Chemical Lift-Off Lithography. *ACS Nano* **9**, 4572-4582  
20 (2015).
- 21 42. El Abbassi, M. *et al.* Robust graphene-based molecular devices. *Nat. Nano.* **14**, 957-961  
22 (2019).
- 23 43. Lee, S. & Nathan, A. Conduction Threshold in Accumulation-Mode InGaZnO Thin Film  
24 Transistors. *Sci. Rep.* **6**, 22567 (2016).
- 25 44. Labram, J. G. *et al.* Energy Quantization in Solution-Processed Layers of Indium Oxide  
26 and Their Application in Resonant Tunneling Diodes. *Adv. Funct. Mater.* **26**, 1656-1663  
27 (2016).
- 28 45. Labram, J. G. *et al.* Signatures of Quantized Energy States in Solution-Processed Ultrathin  
29 Layers of Metal-Oxide Semiconductors and Their Devices. *Adv. Funct. Mater.* **25**, 1727-  
30 1736 (2015).
- 31 46. Lin, Y.-H. *et al.* Hybrid organic–metal oxide multilayer channel transistors with high  
32 operational stability. *Nat. Electron.* **2**, 587-595 (2019).
- 33 47. Wang, X., Register, L. F. & Dodabalapur, A. Redefining the Mobility Edge in Thin-Film  
34 Transistors. *Phys. Rev. Appl.* **11**, 064039 (2019).



- 1 48. Kamiya, T., Nomura, K. & Hosono, H. Present status of amorphous In–Ga–Zn–O thin-  
2 film transistors. *Sci. Technol. Adv. Mater.* **11**, 044305 (2010).
- 3 49. Raja, J. *et al.* Negative gate-bias temperature stability of N-doped InGaZnO active-layer  
4 thin-film transistors. *Appl. Phys. Lett.* **102**, 083505 (2013).
- 5 50. Liu, X. *et al.* Development of an AC electrokinetics-based immunoassay system for on-  
6 site serodiagnosis of infectious diseases. *Sens. Actuat. A-Phys.* **171**, 406-413 (2011).
- 7 51. Gao, X. P. A., Zheng, G. & Lieber, C. M. Subthreshold Regime has the Optimal Sensitivity  
8 for Nanowire FET Biosensors. *Nano Lett.* **10**, 547-552 (2010).
- 9 52. Laib, S., Krieg, A., Häfliger, P. & Agorastos, N. DNA-intercalation on pyrene modified  
10 surface coatings. *Chem. Commun.*, 5566-5568 (2005).
- 11 53. Lin, Y. H., Faber, H., Rossbauer, S. & Anthopoulos, T. D. Solution-processed ZnO  
12 nanoparticle-based transistors via a room-temperature photochemical conversion process.  
13 *Appl. Phys. Lett.* **102**, 193516 (2013).
- 14 54. Matsumoto, K. *et al.* Pyrene-labeled deoxyguanosine as a fluorescence sensor to  
15 discriminate single and double stranded DNA structures: Design of ends free molecular  
16 beacons. *Bioorganic & Medicinal Chemistry Letters* **19**, 6392-6395 (2009).
- 17 55. Stern, E. *et al.* Label-free biomarker detection from whole blood. *Nat. Nano.* **5**, 138 (2009).
- 18 56. Seo, G. *et al.* Rapid Detection of COVID-19 Causative Virus (SARS-CoV-2) in Human  
19 Nasopharyngeal Swab Specimens Using Field-Effect Transistor-Based Biosensor. *ACS*  
20 *Nano* **14**, 5135-5142 (2020).
- 21 57. Abe, M. *et al.* Quantitative detection of protein using a top-gate carbon nanotube field  
22 effect transistor. *J. Phys. Chem. C* **111**, 8667-8670 (2007).
- 23 58. Duan, X. *et al.* Quantification of the affinities and kinetics of protein interactions using  
24 silicon nanowire biosensors. *Nat. Nano.* **7**, 401-407 (2012).
- 25 59. Wang, W. *et al.* Label-free measuring and mapping of binding kinetics of membrane  
26 proteins in single living cells. *Nat. Chem.* **4**, 846-853 (2012).
- 27 60. Duan, X. *et al.* Quantification of the affinities and kinetics of protein interactions using  
28 silicon nanowire biosensors. *Nat. Nano.* **7**, 401-407 (2012).
- 29 61. Xu, S. *et al.* Real-time reliable determination of binding kinetics of DNA hybridization  
30 using a multi-channel graphene biosensor. *Nat. Commun.* **8**, 14902 (2017).
- 31 62. Xie, L., Yao, Y. & Ying, Y. The Application of Terahertz Spectroscopy to Protein  
32 Detection: A Review. *Appl. Spectrosc. Rev.* **49**, 448-461 (2014).
- 33 63. Green, N. M. in *Advances in Protein Chemistry* Vol. 29 (eds C. B. Anfinsen, John T.  
34 Edsall, & Frederic M. Richards) 85-133 (Academic Press, 1975).

- 1 64. Green, N. M. in *Methods in Enzymology* Vol. 184 (eds Meir Wilchek & Edward A. Bayer)  
2 51-67 (Academic Press, 1990).
- 3 65. Qiao, B. & Olvera de la Cruz, M. Enhanced Binding of SARS-CoV-2 Spike Protein to  
4 Receptor by Distal Polybasic Cleavage Sites. *ACS Nano* **14**, 10616-10623 (2020).
- 5 66. Lu, R. *et al.* Genomic characterisation and epidemiology of 2019 novel coronavirus:  
6 implications for virus origins and receptor binding. *The Lancet* **395**, 565-574 (2020).
- 7 67. Tholen, D. W. *et al.* Protocols for determination of limits of detection and limits of  
8 quantitation; approved guideline. *CLSI EPI7-A* **24**, 34 (2004).
- 9 68. McNaught, A. D. *et al.* *IUPAC Compendium of Chemical Terminology: The Gold Book*.  
10 (International Union of Pure and Applied Chemistry, 2006).
- 11 69. Walls, A. C. *et al.* Structure, Function, and Antigenicity of the SARS-CoV-2 Spike  
12 Glycoprotein. *Cell* **181**, 281-292.e286 (2020).
- 13 70. Khim, D. *et al.* Modulation-Doped In<sub>2</sub>O<sub>3</sub>/ZnO Heterojunction Transistors Processed from  
14 Solution. *Adv. Mater.* **29**, 1605837 (2017).

15

## 16 **Acknowledgement**

17 The authors would like to thank Prof. Arnab Pain, as well as Olga Douvropoulou and Raushan  
18 Nugmanova from the Biological and Environmental Science and Engineering (BESE) Division  
19 at KAUST (Saudi Arabia) for fruitful discussion and assistance with the materials related to  
20 the coronavirus spike protein sensing, and Dr Cheng Sheng Lin from Pitotech Co. Ltd (Taiwan)  
21 for useful suggestion and assistance in device modelling and simulation. P.P. and A.D.M.  
22 would like to acknowledge the postdoctoral funding for A.D.M. from Vidyasirimedhi Institute  
23 of Science and Technology (VISTEC). T.D.A. A.S., A.S., W.A., and H.F. acknowledge  
24 financial support from King Abdullah University of Science and Technology (KAUST) and  
25 KAUST Solar Centre.

26

## 27 **Author contributions**

28 Y.-H.L., Y.H., M.H. and T.D.A. conceived the project. Y.-H.L. and Y.H. designed the  
29 experiments. Y.-H.L. designed and fabricated the tri-channel transistor sensors and thin-film  
30 samples, conducted the electrical characterisation, and analysed the device data. Y.H. prepared  
31 analytes, processed self-assembled monolayers and contributed to the molecular intercalation  
32 and kinetics analyses. W.S.A. and Abhinav S. performed additional sensing experiments and  
33 contributed to the analysis of the sensing data. Y.-H.L. and Y.H. performed the UV-Vis

1 measurement. C.-H.L. performed device modelling with Y.-H.L., T.-H.C. and X.-W.X. and  
2 analysed the simulation results with Y.-H.L. P.P. and A.D.M. performed analyses on device  
3 parameters. H.F. carried out the scanning Kelvin probe measurement, collected the electrostatic  
4 potential data, assisted the analysis of the device data, and provided suggestion on the sensing  
5 measurement. Akmaral S. conducted the TEM characterisation. Y.-H.L., Y.H., M.H. and  
6 T.D.A. deduced the sensing mechanism and electronic process. T.D.A. supervised the whole  
7 project. All the authors discussed the results and contributed to the writing of the paper.

8

#### 9 **ADDITIONAL INFORMATION**

10 Correspondence and request for materials should be addressed to

11 [thomas.anthopoulos@kaust.edu.sa](mailto:thomas.anthopoulos@kaust.edu.sa);

12 [m.heeney@imperial.ac.uk](mailto:m.heeney@imperial.ac.uk);

13 [yen-hung.lin@physics.ox.ac.uk](mailto:yen-hung.lin@physics.ox.ac.uk);

14

#### 15 **COMPETING INTERESTS**

16 The authors declare no competing financial interests.
